# Supplementary material
Source: PubMed Central journal article supplement (PMC10494788)
Supplement: NIHMS1920570-supplement-1.pdf [file NIHMS1920570-supplement-1.pdf]

## Supplemental Figure S1 (Related to Figures 1 and 2)

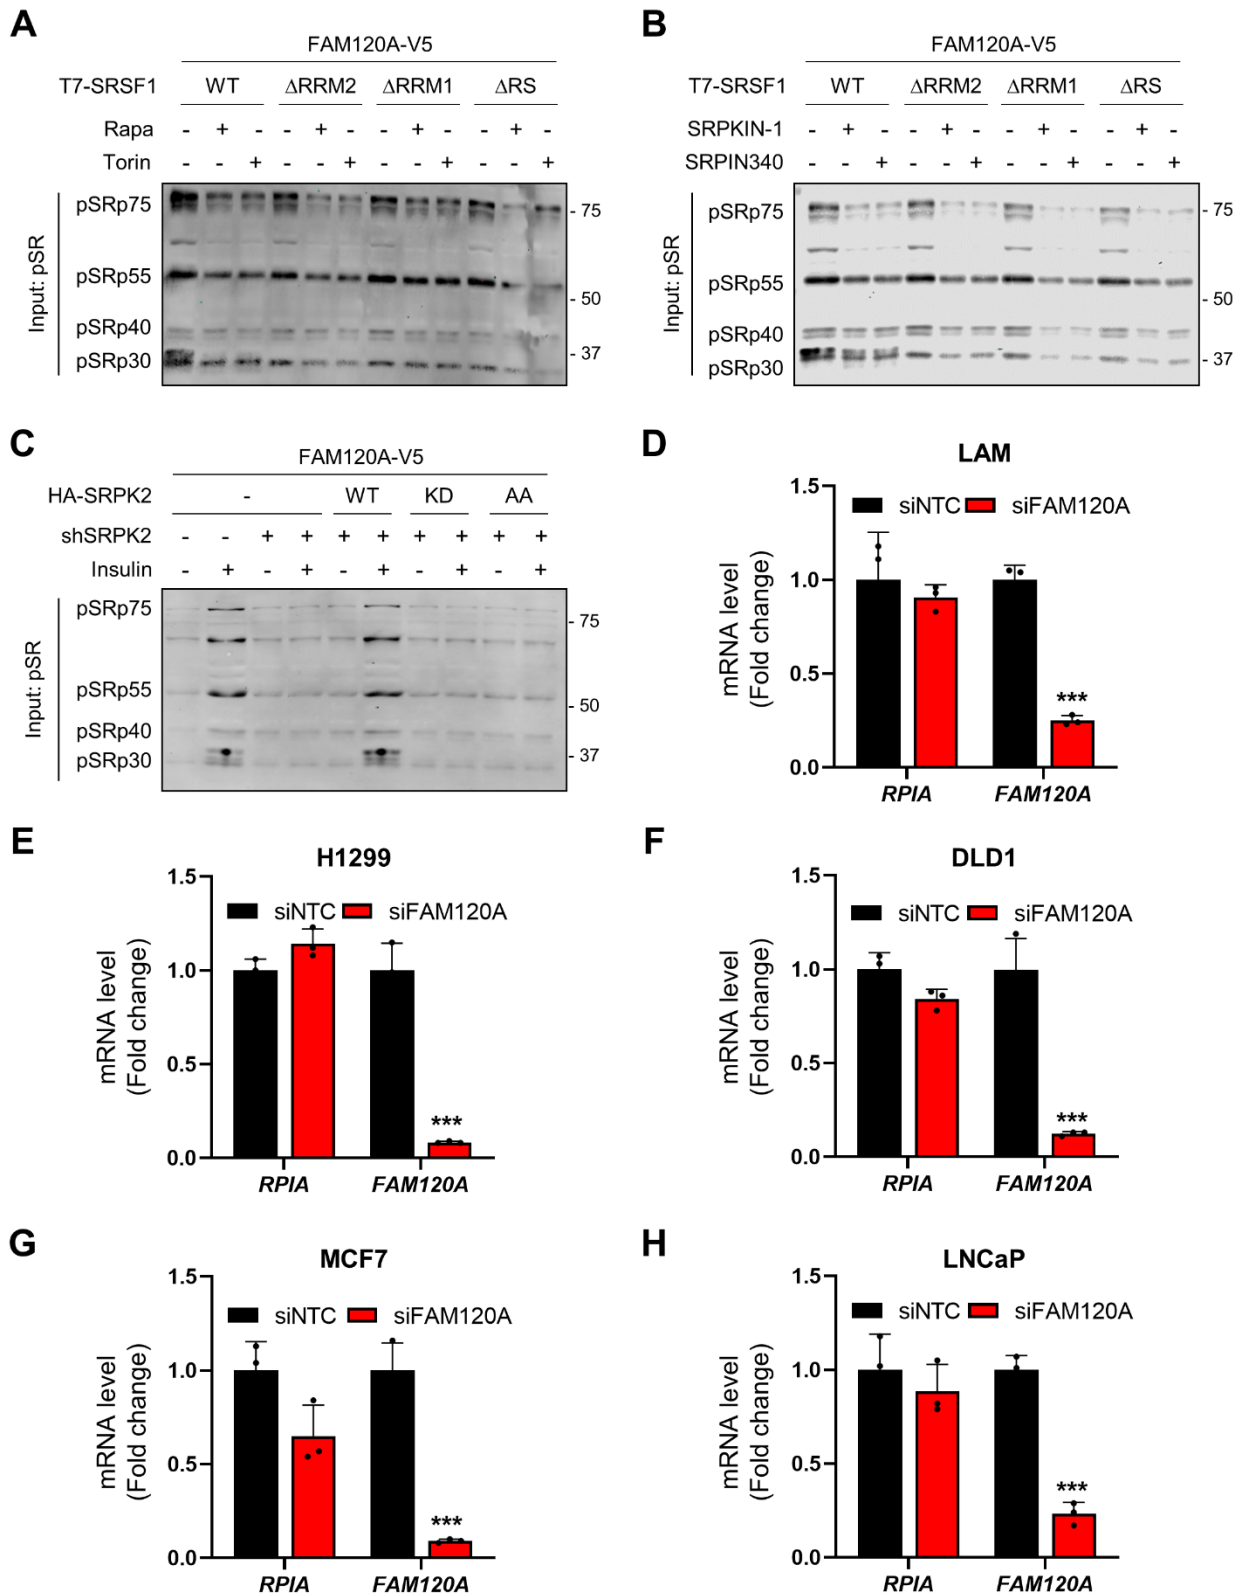

**Supplemental Figure S1. Confirmation of SR protein phosphorylation and additional qPCR analysis of *FAM120A* knockdown cells (Related to Figures 1 and 2).**

**(A, B)** Immunoblot analysis of HEK293E cells expressing FAM120A-V5 and T7-SRSF1 (WT or mutants). Cells were treated with torin1 (250 nM), Rapamycin (100 nM) (A) or SRPK inhibitors (SRPKIN-1, 5  $\mu$ M; SRPIN340, 30  $\mu$ M) (B) for 4 hr.

**(C)** Immunoblot analysis of HEK293E cells expressing FAM120A-V5 and HA-SRPK2 (WT (wild type), KD (kinase dead, SRPK2-K110M), or AA (non-phosphorylatable, SRPK2-S394A/S397A)). Endogenous *SRPK2* was knocked down by shRNA targeting 3'UTR of *SRPK2*. Cells were serum starved overnight followed by insulin (100 nM) stimulation for 4 hr.

**(D-H)** QPCR analysis of LAM (D), H1299 (E), DLD1 (F), MCF7 (G), and LNCaP (H) cells transfected with siRNAs targeting *FAM120A* or control. Cells were serum-starved overnight before analysis. N = 3. \*\*\* $p < 0.001$ .

# Supplemental Figure S2 (Related to Figure 3)

**A**

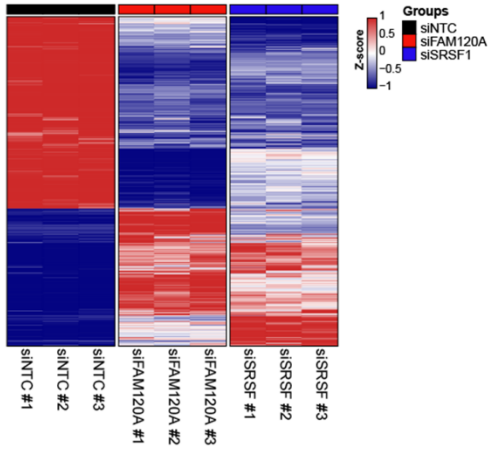

**B**

Pathway analysis of genes downregulated in both siFAM120A and siSRSF1 (n = 1,585)

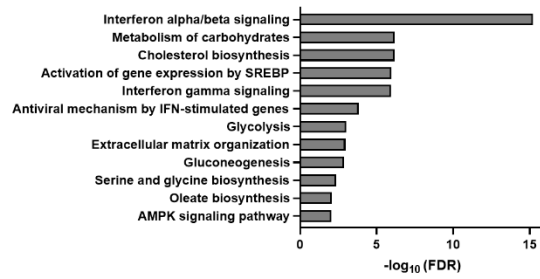

**C**

Increased splicing events

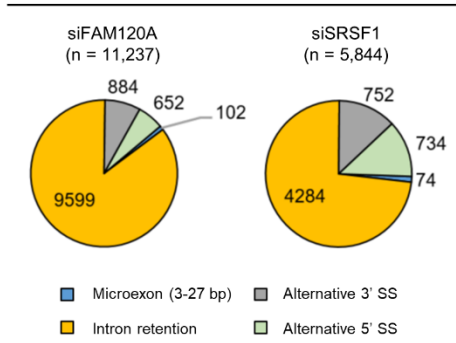

**D**

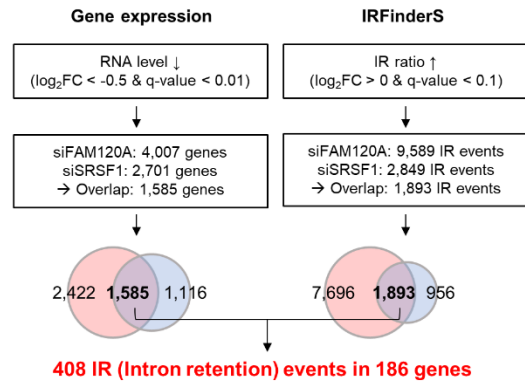

**E**

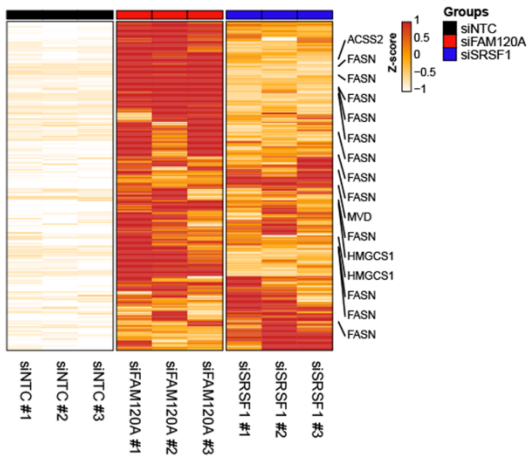

**F**

Pathway analysis of IR-increased and gene expression-decreased genes (n = 186)

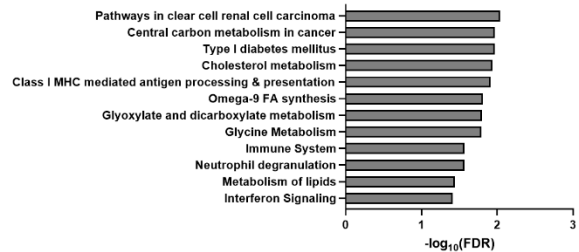

**Supplemental Figure S2. Analysis of intron retention in LAM cells knocked down with *FAM120A* or *SRSF1* (Related to Figure 3).**

**(A)** Heatmap of z-scores for differentially expressed gene levels (cutoff:  $|\text{Log}_2\text{FC}| \geq 0.5$ , q-value  $< 0.01$ ; N = 2,895) analyzed from RNA-seq results of LAM cells transfected with siNTC, siFAM120A, or siSRSF1 (GSE229657). Same RNA-seq data are used in Figures 3 and S2.

**(B)** Pathway analysis of genes from (A) that are significantly downregulated (cutoff:  $\text{Log}_2\text{FC} \leq -0.5$ , q-value  $< 0.01$ ; N = 1,585) by both siFAM120A and siSRSF1.

**(C)** Circular histogram shows the distribution of various splicing events in siFAM120A and siSRSF1 analyzed by VAST-TOOLS.

**(D)** Scheme of identifying the genes that show increased intron retention (IR) and decreased gene expression by both siFAM120A and siSRSF1 compared to control.

**(E)** Heatmap of z-scores for intron retention ratios calculated using IRFinderS. 408 intron loci were found to exhibit significant intron retention in siFAM120A and siSRSF1 compared to control including the introns of *de novo* lipid synthesis enzymes (gene names listed on the right side of the heatmap).

**(F)** Pathway analysis of genes from (D) that show IR-increase and gene expression decrease in both siFAM120A and siSRSF1 (N = 186).

## Supplemental Figure S3 (Related to Figure 4)

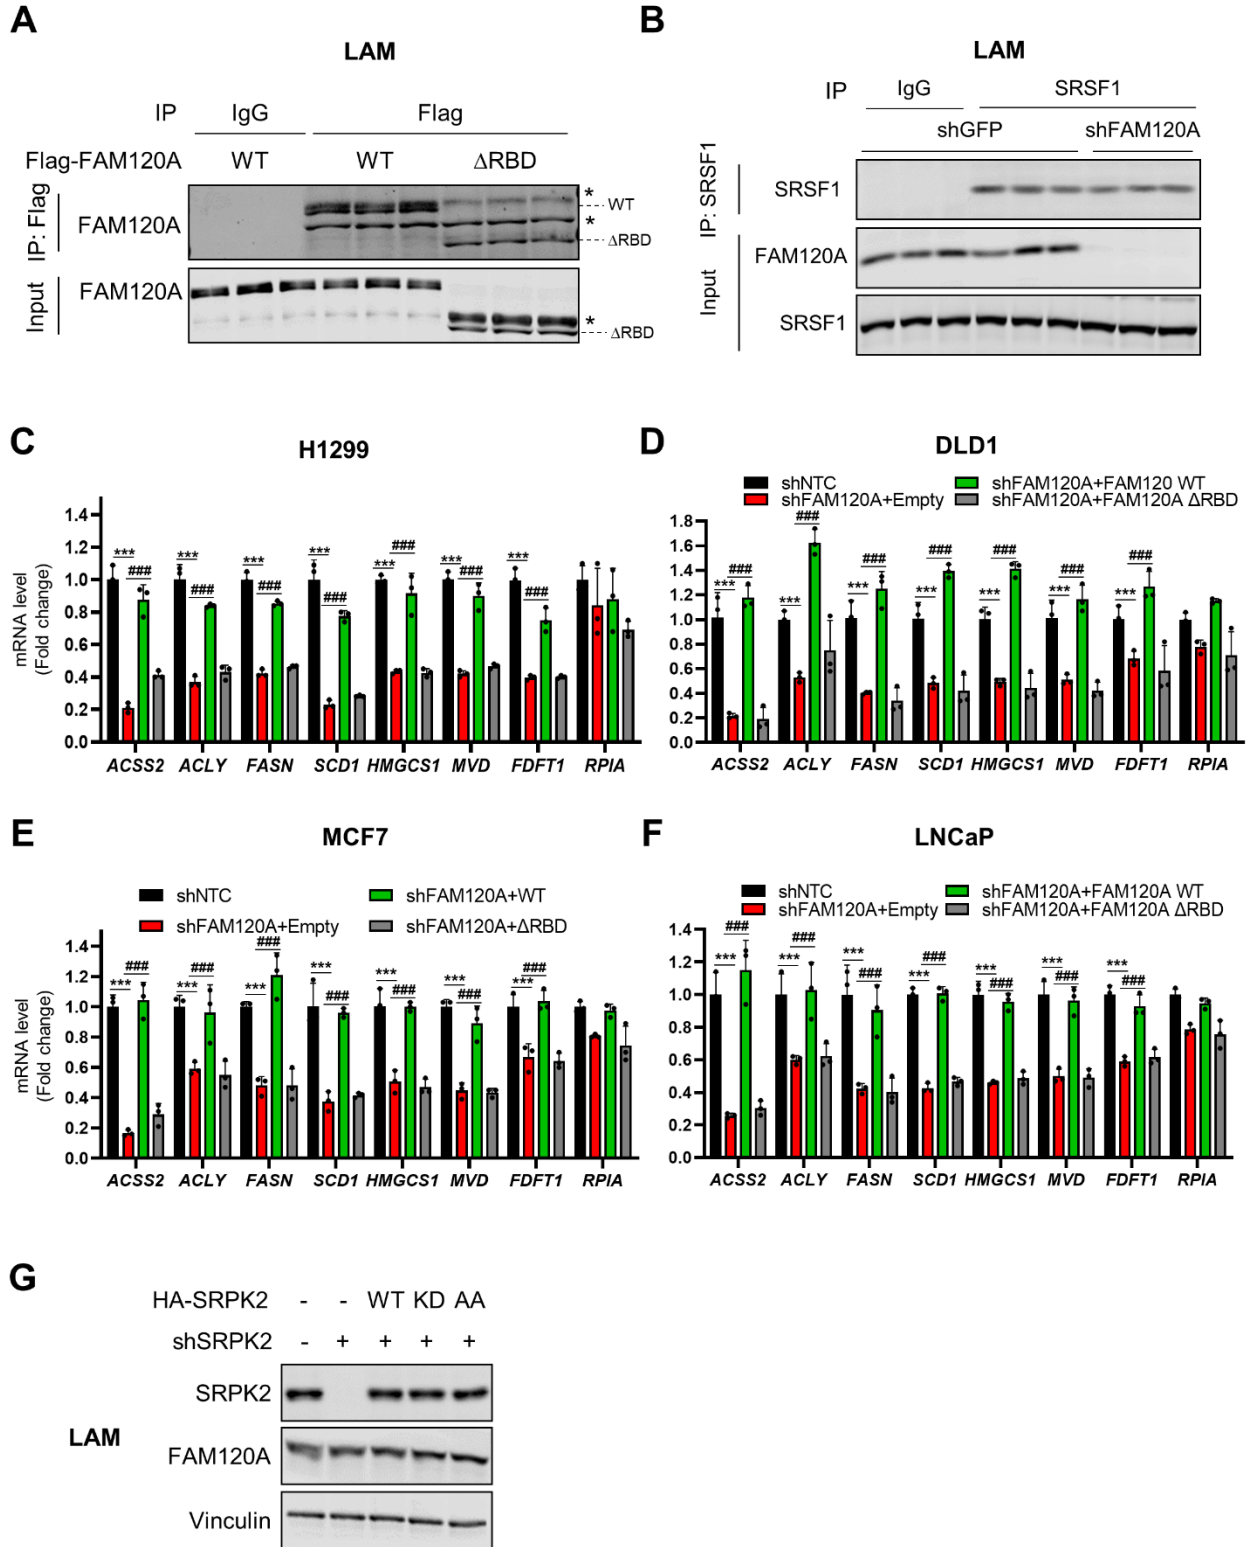

**Supplemental Figure S3. Additional immunoblot and qPCR analysis of cells overexpressing or knocked down with *FAM120A* (Related to Figure 4).**

**(A)** Immunoblot analysis of RIP products from LAM cells expressing Flag-FAM120A WT or  $\Delta$ RBD. 1% of total cell lysate was loaded as an input. Asterisks indicate non-specific bands.

**(B)** Immunoblot analysis of RIP products of LAM cells stably expressing shRNAs targeting *FAM120A* or control. 1% of total cell lysate was loaded as an input.

**(C-F)** QPCR analysis of H1299 (C), DLD1 (D), MCF7 (E), and LNCaP (F) cells stably expressing shNTC or shFAM120A with *FAM120A* WT or  $\Delta$ RBD. Cells were serum starved overnight before analysis. N = 3. Data are represented as mean  $\pm$  SD. \*\*\* $p < 0.001$  and #### $p < 0.001$ .

**(G)** Immunoblot analysis of LAM cells stably expressing HA-SRPK2 (WT (wild type), KD (kinase dead, SRPK2-K110M), or AA (non-phosphorylatable, SRPK2-S394A/S397A)). Endogenous *SRPK2* was knocked down by shRNA targeting 3'UTR of *SRPK2*. Cells were serum-starved overnight.

## Supplemental Figure S4 (Related to Figure 5)

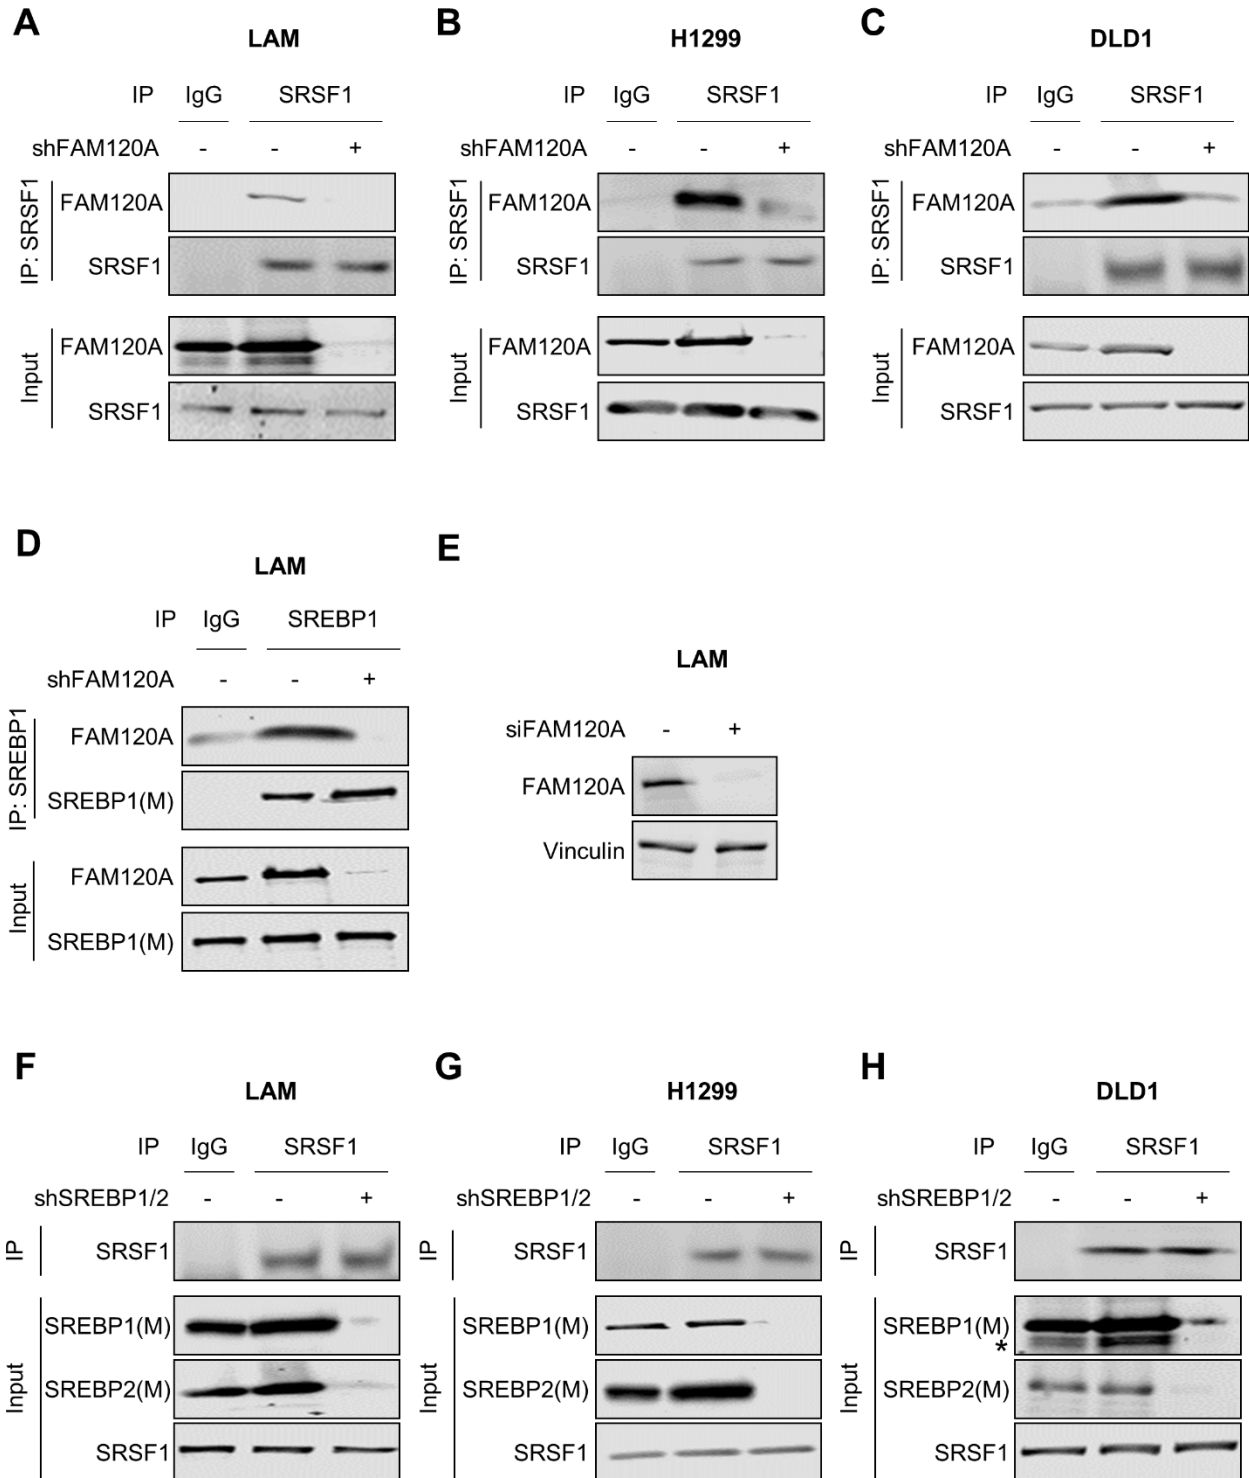

**Supplemental Figure S4. Immunoblot analysis of ChIP samples prepared from cells knocked down with *FAM120A* or *SREBP1/2* (Related to Figure 5).**

**(A-C)** Immunoblot analysis of ChIP products from LAM (A), H1299 (B), and DLD1 (C) cells stably expressing shNTC or shFAM120A. IP was performed with IgG or anti-SRSF1 antibodies.

**(D)** Immunoblot analysis of ChIP products from LAM stably expressing shNTC or shFAM120A. IP was performed with IgG or anti-SREBP1 antibodies.

**(E)** Immunoblot analysis of LAM cells transfected with siRNAs targeting *FAM120A* or control.

**(F-H)** Immunoblot analysis of ChIP products from LAM (F), H1299 (G), and DLD1 (H) cells stably expressing shNTC or shSREBP1/2. IP was performed with IgG or anti-SRSF1 antibodies.



## Supplemental Figure S5 (Related to Figure 6)

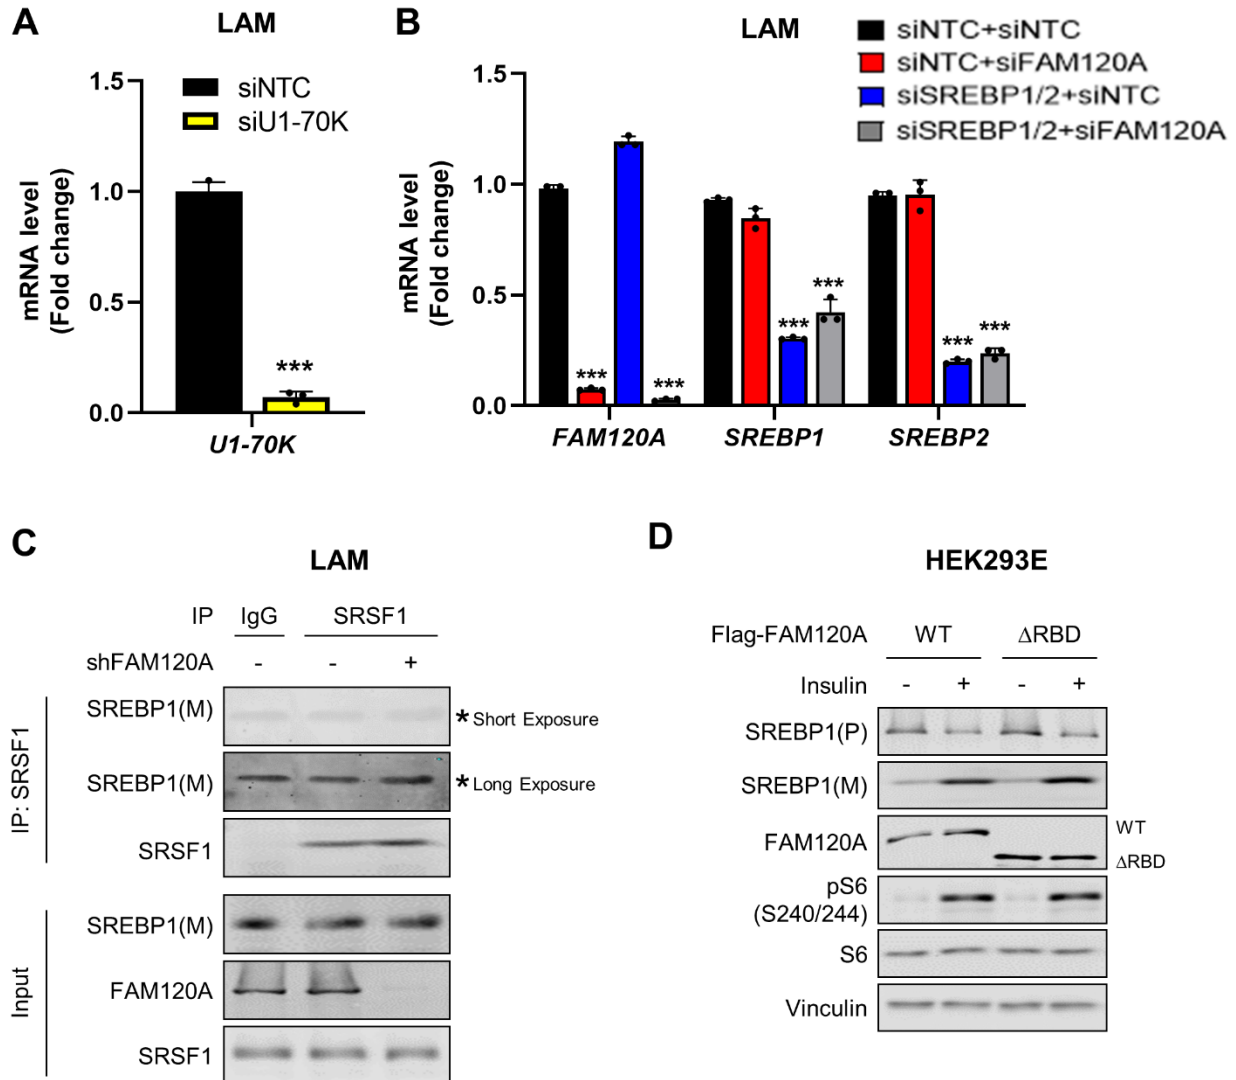

### Supplemental Figure S5. Immunoblot and qPCR analysis of cells overexpressing or knocked down with *FAM120A* or *SREBP1/2* (Related to Figure 6).

(A) QPCR analysis of LAM cells transfected with siRNAs targeting *U1-70K* or control. Cells were serum-starved overnight before analysis. N = 3.

(B) QPCR analysis of LAM cells transfected with siRNAs targeting *FAM120A*, *SREBP1/2*, or control. Cells were serum-starved overnight before analysis. N = 3.

(C) Co-IP analysis of LAM cells stably expressing shRNAs targeting *FAM120A* or control. Immunoprecipitation was performed with IgG or anti-SRSF1 antibodies. 1% of total cell lysate was loaded as an input. Asterisks indicate non-specific binding of SREBP1 to IgG.

**(D)** Immunoblot analysis of HEK293E cells expressing Flag-FAM120A WT or  $\Delta$ RBD. Cells were serum starved overnight followed by insulin (100 nM) stimulation for 4 hr. SREBP1(P), precursor SREBP1; SREBP1(M), cleaved and matured SREBP1.

Data are represented as mean  $\pm$  SD. \*\*\* $p < 0.001$ .

## Supplemental Figure S6 (Related to all Figures)

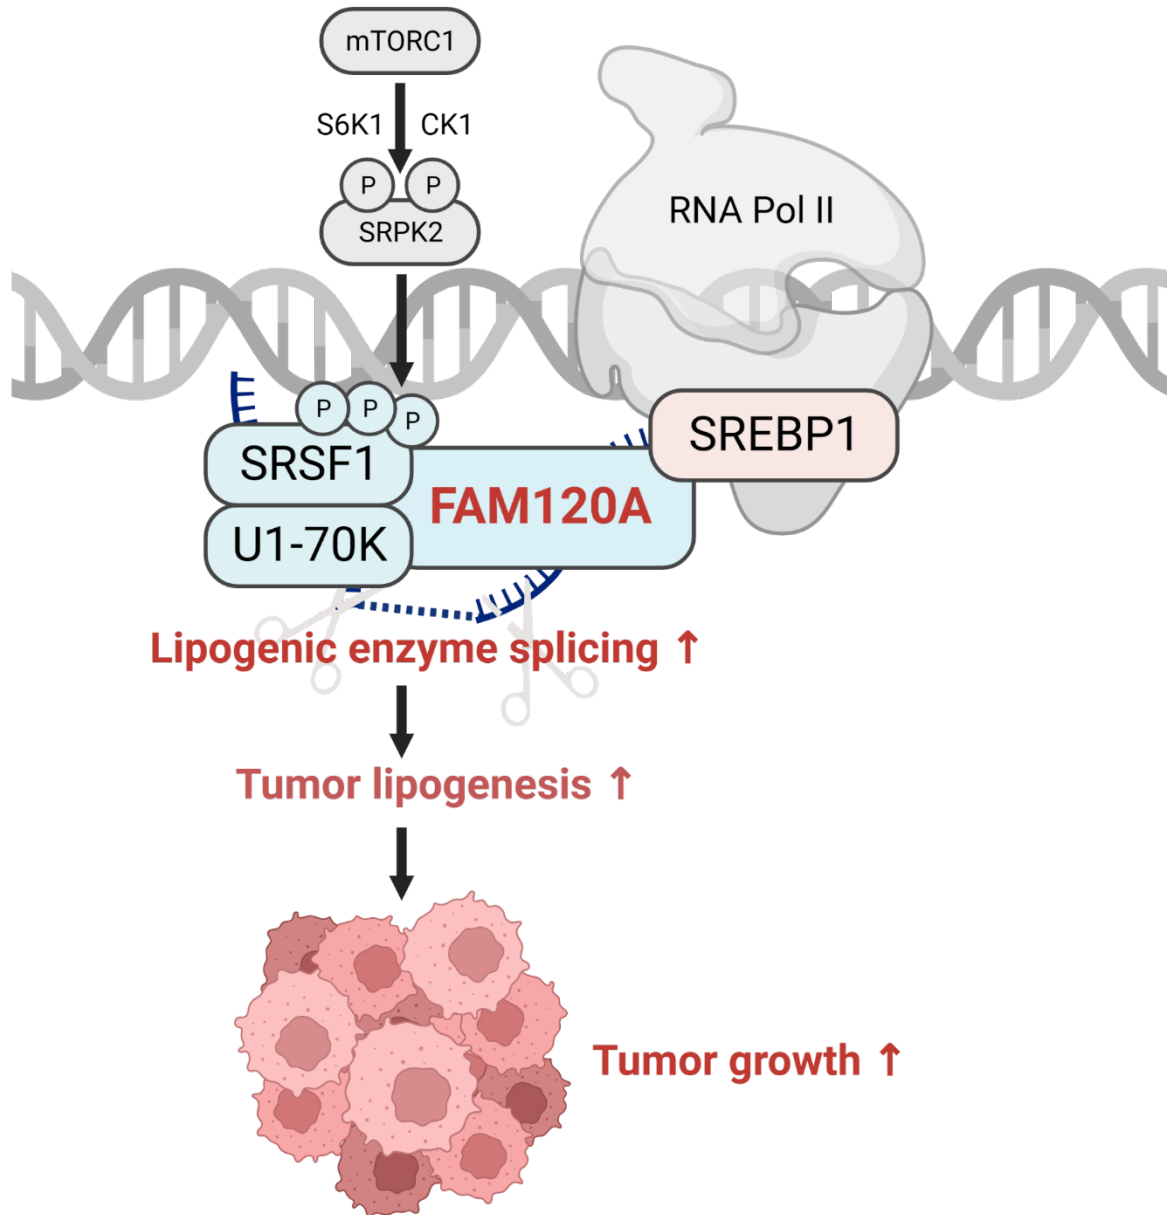

### Supplemental Figure S6. mTORC1 promotes *de novo* lipogenesis through FAM120A (Related to all Figures).

Through phosphorylation of SRSF1, mTORC1-SRPK2 induces the interaction of FAM120A with RNA splicing factors SRSF1 and U1-70K. FAM120A also interacts with a transcription factor SREBP1 and RNA pol II to promote efficient splicing of lipogenic transcripts through SRSF1 and

U1-70K. The spliced lipogenic gene transcripts produce lipogenic enzymes to induce lipid synthesis and tumor growth.

## Supplemental Figure S7 (Related to Figure 7)

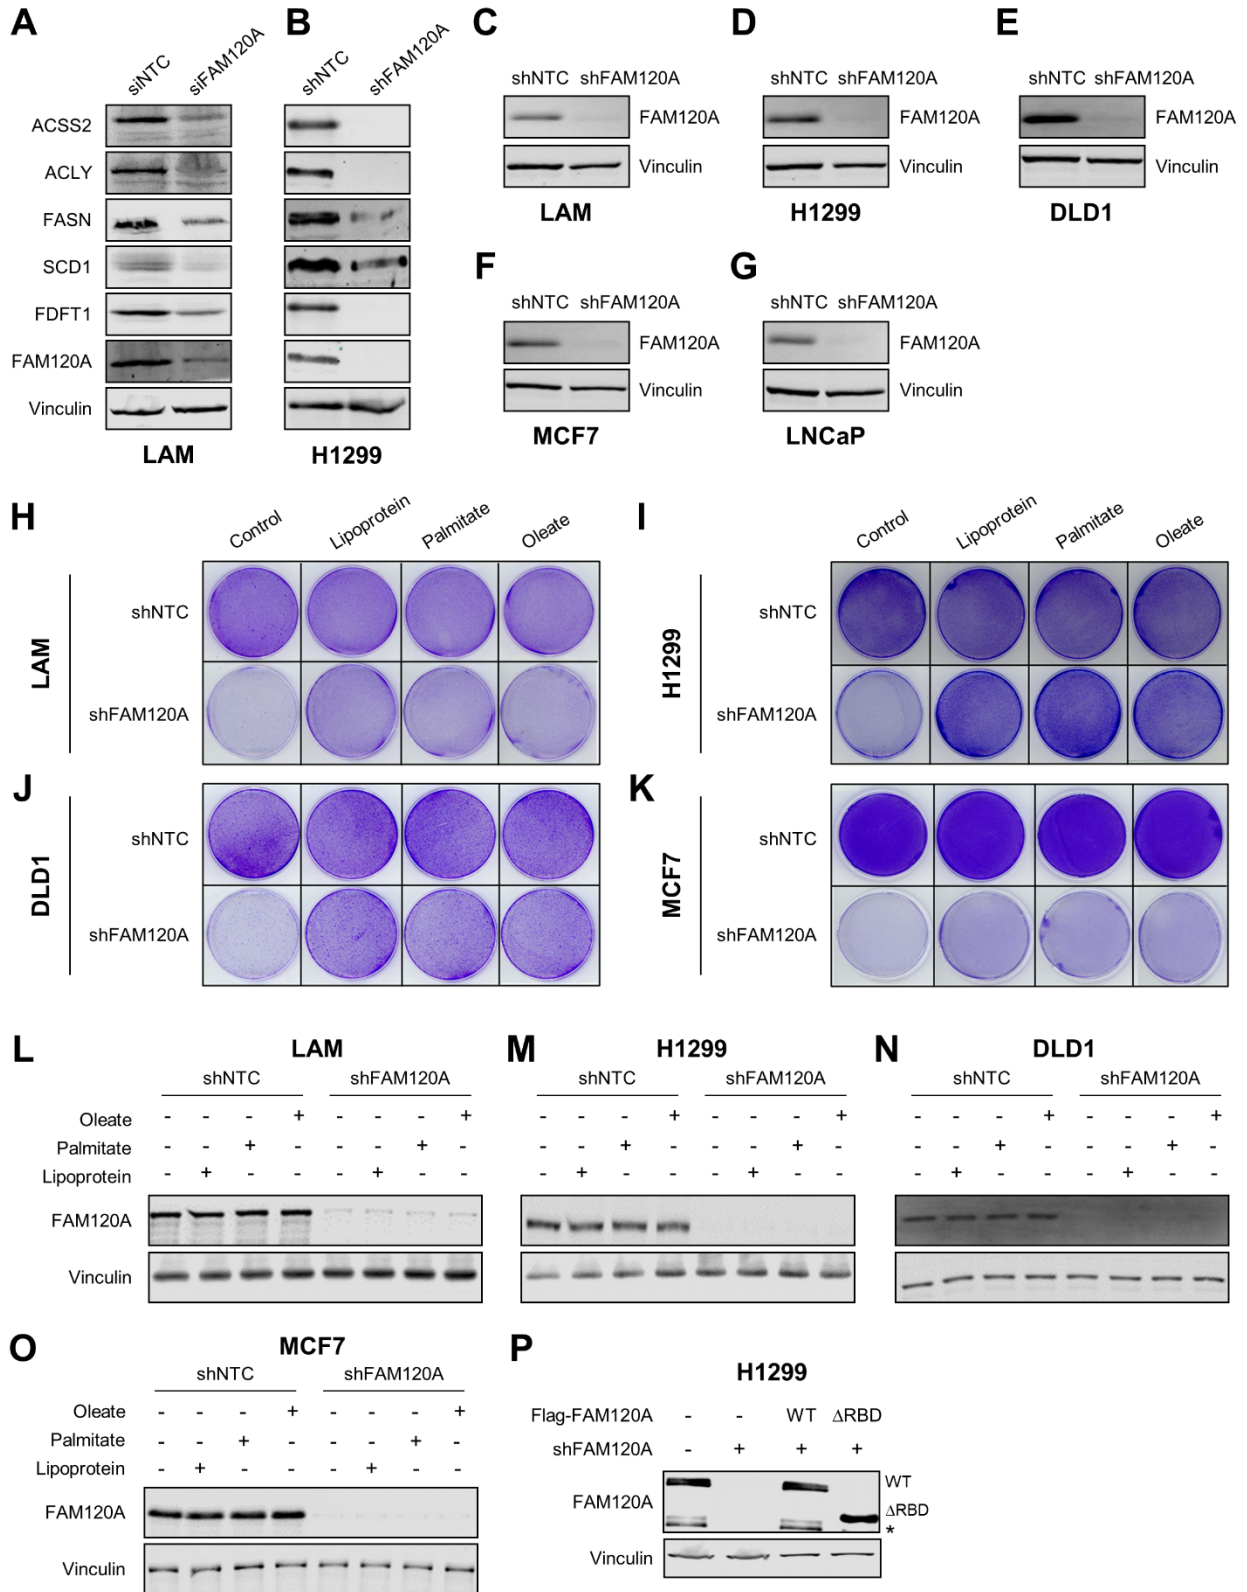

**Supplemental Figure S7. Additional immunoblot analysis and cell growth analysis images of cells knocked down with or overexpressing *FAM120A* (Related to Figure 7).**

**(A)** Immunoblot analysis of LAM cells transfected with siRNAs targeting *FAM120A* or control.

**(B-G)** Immunoblot analysis of H1299 (B, D), LAM (C), DLD1 (E), MCF7 (F), and LNCaP (G) cells stably expressing shRNAs targeting *FAM120A* or control.

**(H-K)** Crystal violet staining of LAM (H), H1299 (I), DLD1 (J), and MCF7 (K) cells stably expressing shRNAs targeting *FAM120A* or control. Cells were grown in lipoprotein-deficient serum (LPDS)-containing media supplemented with lipoprotein (25 µg/ml), palmitate-albumin (10 µM, palmitate), oleate-albumin (50 µM, oleate), or fatty acid-free albumin (25 µM, control).

**(L-O)** Immunoblot analysis of LAM (L), H1299 (M), DLD1 (N), and MCF7 (O) cells stably expressing shRNAs targeting *FAM120A* or control. Cells were treated as described in (H-K).

**(P)** Immunoblot analysis of xenograft H1299 tumors stably expressing shNTC or shFAM120A with *FAM120A* WT or  $\Delta$ RBD. Asterisk indicates a non-specific band.
